# Supplementary material for: Functional insight into Cordyceps militaris sugar transporters by structure modeling, network analysis and allosteric regulation
Source: Royal Society of Chemistry journal article supplement (doi:10.1039/d2cp05611a), 2023-01-01
Supplement: d2cp05611a1.pdf [file d2cp05611a1.pdf]

## Supporting Information

### Functional Insight into *Cordyceps militaris* Sugar Transporters by Structure Modeling, Network Analysis and Allosteric Regulation

Xin Liu,<sup>a,b</sup> Hanyang Zhang,<sup>a</sup> Ziyun Zhou,<sup>a,c</sup> Pranesha Prabhakaran,<sup>d,e</sup> Wanwipa Vongsangnak,<sup>\*e,f</sup> Guang Hu,<sup>\*a,c</sup> and Fei Xiao <sup>\*a</sup>

*a. Center for Systems Biology, Department of Bioinformatics, School of Biology and Basic Medical Sciences, Suzhou Medical College of Soochow University, Suzhou 215123, China.*

*b. Institute of Blood and Marrow Transplantation, Medical College of Soochow University, Jiangsu Institute of Hematology, The first Affiliated Hospital of Soochow University, Collaborative Innovation Center of Hematology, National Clinical Research Center for Hematologic Diseases, Soochow University, Suzhou 215123, China.*

*c. Jiangsu Province Engineering Research Center of Precision Diagnostics and Therapeutics Development, Suzhou, 215123, China*

*d. Interdisciplinary Graduate Program in Bioscience, Faculty of Science, Kasetsart University, Bangkok 10900, Thailand.*

*e. Omics Center for Agriculture, Bioresources, Food, and Health, Faculty of Science, Kasetsart University (OmiKU), Bangkok 10900, Thailand.*

*f. Department of Zoology, Faculty of Science, Kasetsart University, Bangkok 10900, Thailand.*

<sup>†</sup> \*Corresponding authors.

Email address: wanwipa.v@ku.ac.th (W.V.); huguang@suda.edu.cn (G.H.); xiaofei@suda.edu.cn (F.X.)

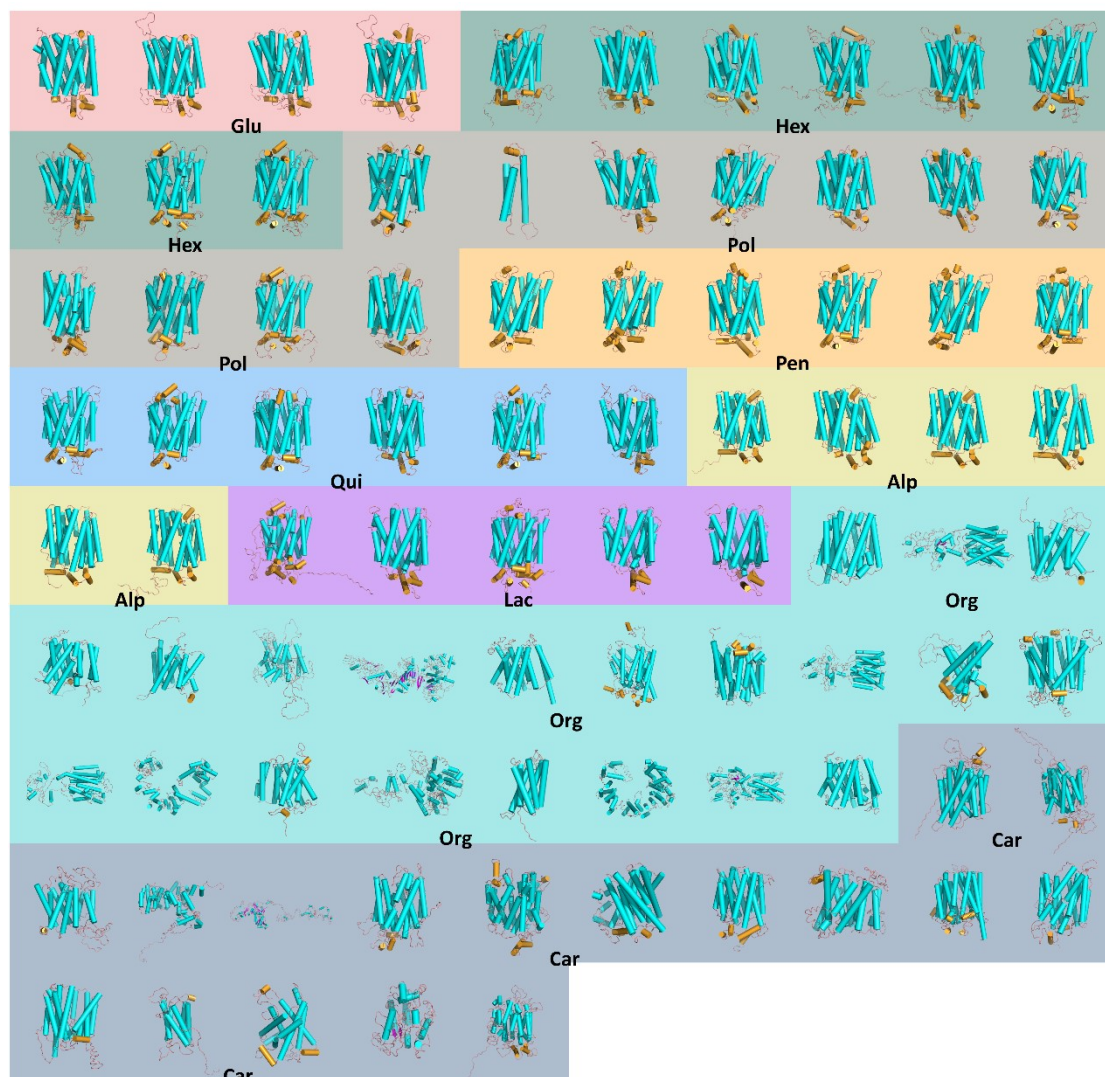

**Fig. S1** Three-dimensional structural modeling results of 85 *C. militaris* sugar transport proteins. Protein structures are represented as colored cartoon, and each subfamily is marked with a different background color.

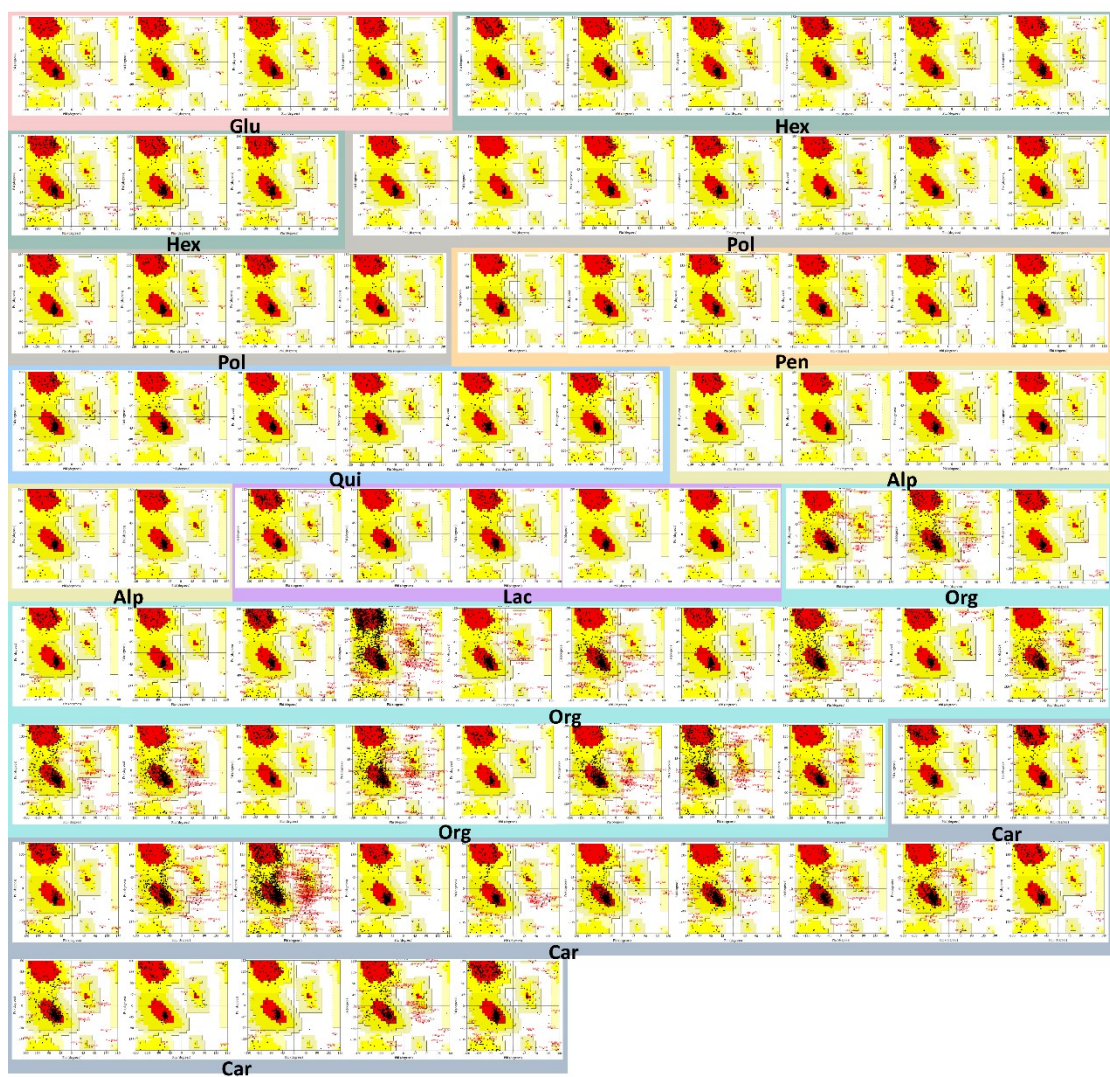

**Fig. S2** Ramachandran plots of evaluation results of all *C. militaris* sugar transport protein modeling results.

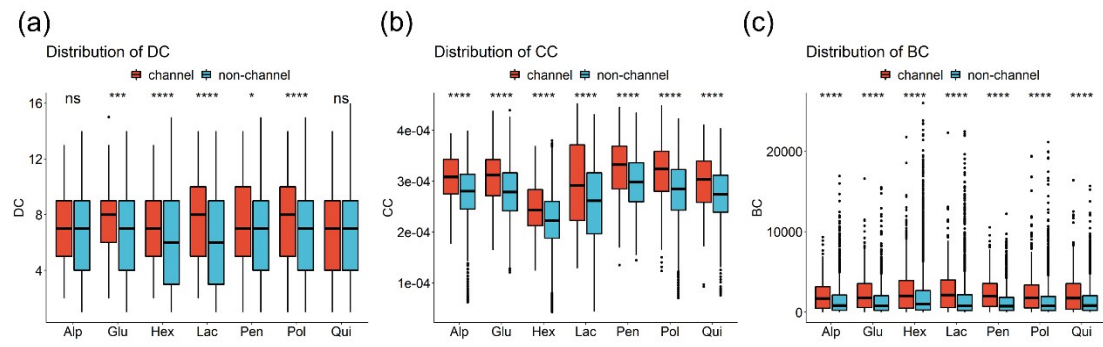

**Fig. S3** Distribution of network parameters (a) DC, (b) CC, (c) BC in channel and non-channel residues in each subfamily.

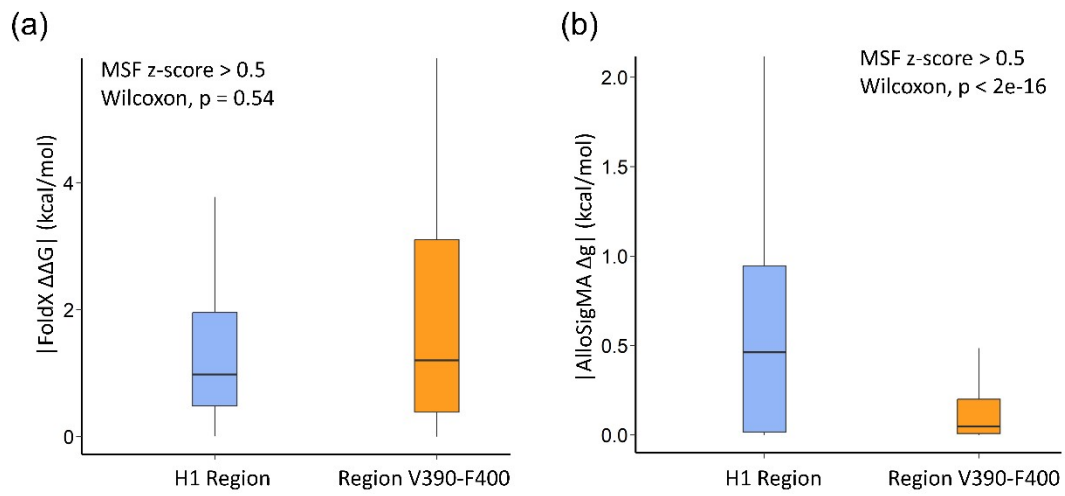

**Fig. S4** The effect of saturation mutation on (a) the folding free energy  $\Delta\Delta G$  for all residues with MSF z-score > 0.5 in the H1 region and V390-F400 region, as well as (b) the allosteric  $\Delta g$ , was compared by Wilcoxon signed ranking test.

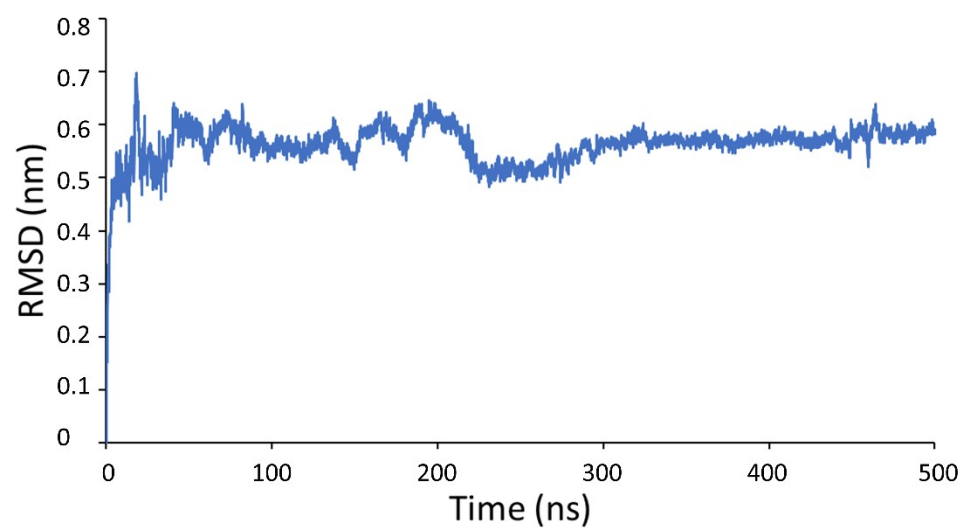

**Fig. S5** RMSD of Cα atoms of Hex06741 during MD simulation.

**Table S1.** Subfamily classification information of *C. militaris* sugar transport proteins.

| Subfamily           | Abbreviation | Protein id | Protein abbreviation |
|---------------------|--------------|------------|----------------------|
| alpha-glucoside     | Alp          | CCM_00728  | Alp 00728            |
| alpha-glucoside     | Alp          | CCM_02083  | Alp 02083            |
| alpha-glucoside     | Alp          | CCM_07255  | Alp 07255            |
| alpha-glucoside     | Alp          | CCM_07490  | Alp 07490            |
| alpha-glucoside     | Alp          | CCM_07588  | Alp 07588            |
| alpha-glucoside     | Alp          | CCM_08696  | Alp 08696            |
| carboxylate         | Car          | CCM_00851  | Car 00851            |
| carboxylate         | Car          | CCM_01120  | Car 01120            |
| carboxylate         | Car          | CCM_01719  | Car 01719            |
| carboxylate         | Car          | CCM_03592  | Car 03592            |
| carboxylate         | Car          | CCM_04459  | Car 04459            |
| carboxylate         | Car          | CCM_04581  | Car 04581            |
| carboxylate         | Car          | CCM_04643  | Car 04643            |
| carboxylate         | Car          | CCM_05263  | Car 05263            |
| carboxylate         | Car          | CCM_05651  | Car 05651            |
| carboxylate         | Car          | CCM_05803  | Car 05803            |
| carboxylate         | Car          | CCM_06052  | Car 06052            |
| carboxylate         | Car          | CCM_06456  | Car 06456            |
| carboxylate         | Car          | CCM_07432  | Car 07432            |
| carboxylate         | Car          | CCM_07990  | Car 07990            |
| carboxylate         | Car          | CCM_08224  | Car 08224            |
| carboxylate         | Car          | CCM_09352  | Car 09352            |
| carboxylate         | Car          | CCM_09518  | Car 09518            |
| glucose             | Glu          | CCM_00222  | Glu 00222            |
| glucose             | Glu          | CCM_02140  | Glu 02140            |
| glucose             | Glu          | CCM_03623  | Glu 03623            |
| glucose             | Glu          | CCM_04896  | Glu 04896            |
| other hexose sugars | Hex          | CCM_01166  | Hex 01166            |
| other hexose sugars | Hex          | CCM_02729  | Hex 02729            |
| other hexose sugars | Hex          | CCM_03583  | Hex 03583            |
| other hexose sugars | Hex          | CCM_04946  | Hex 04946            |
| other hexose sugars | Hex          | CCM_05726  | Hex 05726            |
| other hexose sugars | Hex          | CCM_06741  | Hex 06741            |
| other hexose sugars | Hex          | CCM_07674  | Hex 07674            |
| other hexose sugars | Hex          | CCM_08090  | Hex 08090            |
| other hexose sugars | Hex          | CCM_09544  | Hex 09544            |
| lactose             | Lac          | CCM_03819  | Lac 03819            |
| lactose             | Lac          | CCM_05297  | Lac 05297            |
| lactose             | Lac          | CCM_07980  | Lac 07980            |
| lactose             | Lac          | CCM_08600  | Lac 08600            |
| lactose             | Lac          | CCM_09094  | Lac 09094            |

|               |     |           |           |
|---------------|-----|-----------|-----------|
| organic anion | Org | CCM_00002 | Org 00002 |
| organic anion | Org | CCM_00013 | Org 00013 |
| organic anion | Org | CCM_00156 | Org 00156 |
| organic anion | Org | CCM_00266 | Org 00266 |
| organic anion | Org | CCM_00449 | Org 00449 |
| organic anion | Org | CCM_01038 | Org 01038 |
| organic anion | Org | CCM_02068 | Org 02068 |
| organic anion | Org | CCM_02414 | Org 02414 |
| organic anion | Org | CCM_03338 | Org 03338 |
| organic anion | Org | CCM_03480 | Org 03480 |
| organic anion | Org | CCM_04743 | Org 04743 |
| organic anion | Org | CCM_05810 | Org 05810 |
| organic anion | Org | CCM_05926 | Org 05926 |
| organic anion | Org | CCM_07068 | Org 07068 |
| organic anion | Org | CCM_07086 | Org 07086 |
| organic anion | Org | CCM_07408 | Org 07408 |
| organic anion | Org | CCM_07420 | Org 07420 |
| organic anion | Org | CCM_07625 | Org 07625 |
| organic anion | Org | CCM_07673 | Org 07673 |
| organic anion | Org | CCM_07725 | Org 07725 |
| organic anion | Org | CCM_09563 | Org 09563 |
| pentose       | Pen | CCM_01139 | Pen 01139 |
| pentose       | Pen | CCM_02098 | Pen 02098 |
| pentose       | Pen | CCM_05984 | Pen 05984 |
| pentose       | Pen | CCM_06358 | Pen 06358 |
| pentose       | Pen | CCM_08290 | Pen 08290 |
| pentose       | Pen | CCM_09215 | Pen 09215 |
| polyol        | Pol | CCM_00501 | Pol 00501 |
| polyol        | Pol | CCM_01080 | Pol 01080 |
| polyol        | Pol | CCM_01532 | Pol 01532 |
| polyol        | Pol | CCM_03115 | Pol 03115 |
| polyol        | Pol | CCM_04797 | Pol 4797  |
| polyol        | Pol | CCM_05298 | Pol 05298 |
| polyol        | Pol | CCM_06039 | Pol 06039 |
| polyol        | Pol | CCM_06864 | Pol 06864 |
| polyol        | Pol | CCM_08999 | Pol 08999 |
| polyol        | Pol | CCM_09026 | Pol 09026 |
| polyol        | Pol | CCM_09671 | Pol 09671 |
| quinate       | Qui | CCM_00186 | Qui 00186 |
| quinate       | Qui | CCM_03527 | Qui 03527 |
| quinate       | Qui | CCM_04942 | Qui 04942 |
| quinate       | Qui | CCM_06002 | Qui 06002 |
| quinate       | Qui | CCM_07760 | Qui 07760 |

|       |     |           |           |
|-------|-----|-----------|-----------|
| quate | Qui | CCM_08598 | Qui 08598 |
|-------|-----|-----------|-----------|

**Table S2.** Channel properties for Alp00728 transporter.

| Snapshot | Channel | Throughput <sup>1</sup> | Cost <sup>2</sup> | Bottleneck radius <sup>3</sup> | Length <sup>4</sup> | Curvature <sup>5</sup> | Bottleneck Residue <sup>6</sup> |
|----------|---------|-------------------------|-------------------|--------------------------------|---------------------|------------------------|---------------------------------|
| Alp00728 | 18      | 0.26                    | 1.34              | 0.89                           | 69.41               | 1.44                   | Y283;G282;                      |
| Alp00728 | 19      | 0.25                    | 1.39              | 0.89                           | 62.41               | 1.3                    | I281;T24;                       |
| Alp00728 | 27      | 0.17                    | 1.78              | 0.89                           | 76.65               | 1.32                   | I23;L59;W55                     |

Note: <sup>1</sup>Probability that the pathway is used as a route for transporter of the substances using the formula. <sup>2</sup>The lower the cost value, the higher the order of the channels. In a biological sense, the energy spent by small molecules passing through a channel with a large bottleneck and a short path is lower. <sup>3</sup>Maximal probe size which can fit in the narrowest part of the channel. <sup>4</sup>Length of the channel from the starting point to the protein surface. <sup>5</sup> Shape of the channel as the ratio between the length of the channel and the shortest possible distance between the starting point and the channel ending point. <sup>6</sup>The narrowest part of the channel (bottleneck) including a list of surrounding residues and a static picture of the bottleneck with the channel visualized as spheres and surrounding residues as sticks.

**Table S3.** Basic information on protein transporter channels of different subfamilies.

| Group | Mean of bottleneck radius (Å) | Standard deviation of bottleneck radius (Å) | Mean of channel length (Å) | Standard deviation of channel length (Å) |
|-------|-------------------------------|---------------------------------------------|----------------------------|------------------------------------------|
| Alp   | 0.926                         | 0.074                                       | 69.926                     | 5.688                                    |
| Glu   | 0.898                         | 0.084                                       | 80.255                     | 11.092                                   |
| Hex   | 0.859                         | 0.034                                       | 73.538                     | 10.671                                   |
| Lac   | 0.937                         | 0.12                                        | 68.188                     | 9.222                                    |
| Pen   | 0.869                         | 0.05                                        | 70.638                     | 6.712                                    |
| Pol   | 0.955                         | 0.118                                       | 58.613                     | 19.853                                   |
| Qui   | 0.935                         | 0.12                                        | 72.526                     | 5.666                                    |



**Table S4.** Modeling templates for *C. militaris* sugar transporter proteins.

| Subfamily           | Sequence id | Modeller templates | I-TASSER templates                                             |
|---------------------|-------------|--------------------|----------------------------------------------------------------|
| alpha-glucoside     | CCM_02083   | 4YBQ_A             |                                                                |
| alpha-glucoside     | CCM_07490   | 4ZW9_A             |                                                                |
| alpha-glucoside     | CCM_00728   | 4LDS_A             |                                                                |
| alpha-glucoside     | CCM_07255   | 5EQG_A             |                                                                |
| alpha-glucoside     | CCM_07588   | 6N3I_A             |                                                                |
| alpha-glucoside     | CCM_08696   | 4ZW9_A             |                                                                |
| carboxylate         | CCM_06456   | 4J05_A             |                                                                |
| carboxylate         | CCM_04581   | 4J05_A             |                                                                |
| carboxylate         | CCM_01120   | 4J05_A             |                                                                |
| carboxylate         | CCM_03592   |                    | 4m64A,5gm6G,1pv6A,6cc4A,6t1zA,<br>3ayfA,6g9x,6af0A,6w4s,6n1zA  |
| carboxylate         | CCM_05651   |                    | 4j05A,4j05A,4j05A,6h7d,6h7d,4j05A,<br>5c65,4j05A,6h7dA,4j05A   |
| carboxylate         | CCM_09518   | 4LDS_A             |                                                                |
| carboxylate         | CCM_04643   |                    | 5ifeC,4j05A,5gm6G,4j05A,4xriA,<br>6rw3A,6m2l,6m2l,4j05A,5c65   |
| carboxylate         | CCM_06052   |                    | 4zowA,6d4hA,4zp0A,1qgrA,4zowA,<br>1pw4,4zow,6kki,4zowA,4zp0A   |
| carboxylate         | CCM_07432   |                    | 1pw4A,3o7pA,3o7pA,6g9x,3o7p,<br>1pw4A,1pw4,3o7pA,1pw4A,3o7pA   |
| carboxylate         | CCM_05263   |                    | 3m71A,3ayfA,3m71A,3m73A,6qq5A,<br>3m71,5z1wA,3m71S,5khnB,3m71A |
| carboxylate         | CCM_08224   | 2LCK_A             |                                                                |
| carboxylate         | CCM_01719   | 6OH4_A             |                                                                |
| carboxylate         | CCM_05803   |                    | 6i1rA,6i1rA,6oh2A,5y78,6ukj,<br>6i1rA,6ukj,6i1rA,6t15A,6i1rA   |
| carboxylate         | CCM_07990   | 5YS3_A             |                                                                |
| carboxylate         | CCM_00851   | 4J05_A             |                                                                |
| carboxylate         | CCM_04459   |                    | 2qshA,2qshA,2qshA,2qsh,2qsh,<br>2qshA,2qsh,2qsfA,2qshA,2qsfA   |
| carboxylate         | CCM_09352   |                    | 5tqqA,5m5iA,5y4gA,1gvhA,<br>3t38,5olnA,3t38A,4jo0A             |
| glucose             | CCM_04896   | 4GBY_A             |                                                                |
| glucose             | CCM_02140   | 4LDS_A             |                                                                |
| glucose             | CCM_03623   | 6H7D_A             |                                                                |
| glucose             | CCM_00222   | 6H7D_A             |                                                                |
| other hexose sugars | CCM_06741   | 6H7D_A             |                                                                |
| other hexose sugars | CCM_08090   | 6H7D_A             |                                                                |
| other hexose sugars | CCM_03583   | 6H7D_A             |                                                                |
| other hexose sugars | CCM_07674   | 6H7D_A             |                                                                |
| other hexose sugars | CCM_04946   | 6H7D_A             |                                                                |

|                     |           |        |                                                                |
|---------------------|-----------|--------|----------------------------------------------------------------|
| other hexose sugars | CCM_01166 | 6H7D_A |                                                                |
| other hexose sugars | CCM_05726 | 6H7D_A |                                                                |
| other hexose sugars | CCM_09544 | 6H7D_A |                                                                |
| other hexose sugars | CCM_02729 | 6H7D_A |                                                                |
| lactose             | CCM_08600 | 4LDS_A |                                                                |
| lactose             | CCM_05297 | 6H7D_A |                                                                |
| lactose             | CCM_09094 | 6H7D_A |                                                                |
| lactose             | CCM_03819 | 6H7D_A |                                                                |
| lactose             | CCM_07980 | 6H7D_A |                                                                |
| organic anion       | CCM_03480 | 7BP3_A |                                                                |
| organic anion       | CCM_00002 |        | 3o7pA,3o7pA,3o7pA,6kki,3o7p,<br>3o7pA,6kki,3o7pA,3o7pA,3o7pA,  |
| organic anion       | CCM_00013 |        | 6d4hA,3aqpA,6d4hA,3jac,3jac,<br>5voxB,5tj5,3rkoC,3ayfA,2gb5A   |
| organic anion       | CCM_04743 |        | 6d4hA,3aqpA,6d4hA,3jac,3jac,<br>6d4hA,5tj5,1kplA,2vc9A,5n9yA   |
| organic anion       | CCM_05926 |        | 4m64A,6t1zA,6t1zA,6g9x,4m64,<br>4m64A,4m64,1pw4A,4m64A,1b3uA   |
| organic anion       | CCM_07673 |        | 6bugC,1qgrA,6bugA,1qgrA,6bugC,<br>5oc9A,6bugC,3jd8A,6bug,4fgvA |
| organic anion       | CCM_01038 | 5Y78_A |                                                                |
| organic anion       | CCM_00266 | 5Y78_A |                                                                |
| organic anion       | CCM_09563 |        | 5y78A,5y78A,5y78A,5y78,5y78,<br>5y78A,5y78,5y78A,6yleC,5y78A   |
| organic anion       | CCM_00156 | 5OGE_A |                                                                |
| organic anion       | CCM_00449 | 5OGE_A |                                                                |
| organic anion       | CCM_07068 |        | 5y78A,6d4hA,5y78A,5voxB,5y78A,<br>6d4hA,5y78,5y78,5y78A,5y78   |
| organic anion       | CCM_02414 |        | 5y78A,5y78A,5y78A,5y78,6ukj,<br>5y78A,6ukj,5y78A,6cptA,5y78A   |
| organic anion       | CCM_07625 | 5ZUG_A |                                                                |
| organic anion       | CCM_07408 | 5Y78_A |                                                                |
| organic anion       | CCM_07420 |        | 5y78A,4cr2Z,5y78A,6d4hA,<br>5y78,5yfpC,5y78,2qizA              |
| organic anion       | CCM_07725 |        | 6d4hA,5y78A,5y78A,5y78,5y78,<br>5y81B,5y78,5y78A,1u6gC,5y78A   |
| organic anion       | CCM_05810 | 4C9G_A |                                                                |
| organic anion       | CCM_02068 |        | 6ar6A,6c9dA,5jcsS,6c9dA,5z33,<br>5jcsS,4tmb,5byzA,6emkA,2y94A  |
| organic anion       | CCM_03338 |        | 3wdoA,6e8jA,6e8jA,6g9x,6e8j,<br>6e8jA,6e8j,3wdoA,1qgrA,3wdoA   |
| organic anion       | CCM_07086 |        | 4zowA,4c0oA,3wdoA,4xriA,6t1zA,<br>5m87A,6exs,1qgrA,1pw4,3wdo   |

|         |           |        |  |
|---------|-----------|--------|--|
| pentose | CCM_05984 | 4LDS_A |  |
| pentose | CCM_08290 | 6H7D_A |  |
| pentose | CCM_02098 | 4LDS_A |  |
| pentose | CCM_01139 | 4LDS_A |  |
| pentose | CCM_06358 | 6H7D_A |  |
| pentose | CCM_09215 | 6H7D_A |  |
| polyol  | CCM_03115 | 6H7D_A |  |
| polyol  | CCM_09026 | 6H7D_A |  |
| polyol  | CCM_01080 | 6H7D_A |  |
| polyol  | CCM_01532 | 4LDS_A |  |
| polyol  | CCM_05298 | 4LDS_A |  |
| polyol  | CCM_00501 | 4LDS_A |  |
| polyol  | CCM_04797 | 4LDS_A |  |
| polyol  | CCM_06864 | 4LDS_A |  |
| polyol  | CCM_08999 | 4LDS_A |  |
| polyol  | CCM_06039 | 4PYP_A |  |
| polyol  | CCM_09671 | 5C65_A |  |
| quinate | CCM_00186 | 6H7D_A |  |
| quinate | CCM_03527 | 6H7D_A |  |
| quinate | CCM_04942 | 4GBY_A |  |
| quinate | CCM_06002 | 6H7D_A |  |
| quinate | CCM_07760 | 6H7D_A |  |
| quinate | CCM_08598 | 4QIQ_A |  |
